# Supplementary material for: Polyamine-induced, chiral expression from liquid crystalline peptide nanofilaments to long-range ordered nanohelices
Source: Royal Society of Chemistry journal article supplement (doi:10.1039/c8sm02554a), 2019-01-01
Supplement: c8sm02554a1.pdf [file c8sm02554a1.pdf]

## Supporting information

### **Polyamine-induced, chiral expression from liquid crystalline peptide nanofilaments to long-range ordered nanohelices**

Yuefei Wang,<sup>†,§</sup> Xin Yang,<sup>†</sup> Jiahui Wang,<sup>†</sup> Wei Qi,<sup>\*,†,‡,§</sup> Xuejiao Yang,<sup>†</sup> Xiao Liu,<sup>†</sup> Qiguo Xing,<sup>†</sup> Rongxin Su,<sup>†,‡,§</sup> Zhimin He<sup>†</sup>

<sup>†</sup>State Key Laboratory of Chemical Engineering, School of Chemical Engineering and Technology, Tianjin University, Tianjin 300072, PR China.

<sup>‡</sup> Collaborative Innovation Center of Chemical Science and Engineering (Tianjin), Tianjin 300072, PR China.

<sup>§</sup>Tianjin Key Laboratory of Membrane Science and Desalination Technology, Tianjin 300072, PR China.

\*qiwei@tju.edu.cn

## 1. Supporting figures

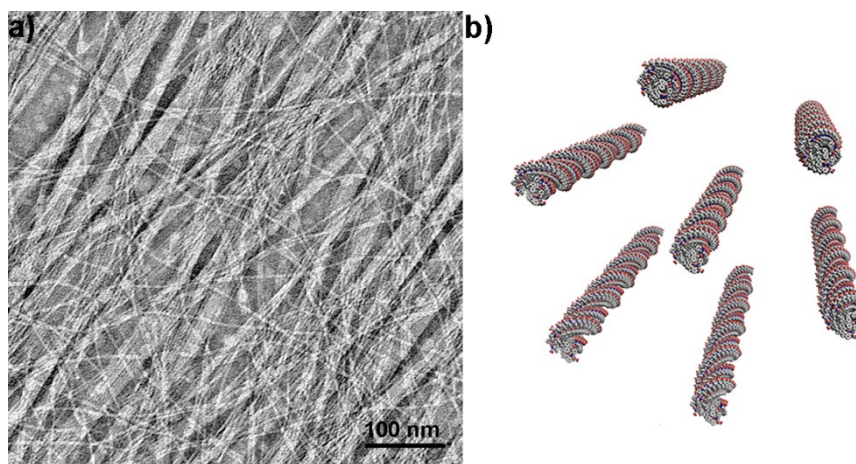

**Fig. S1** a) TEM images showing the nanofilaments self-assembled by Fmoc-FF peptide in 50 mM Tris-HCl buffer at pH 8.8; b) Schematic illustration showing the columnar packing of the nanofilaments.<sup>1</sup>

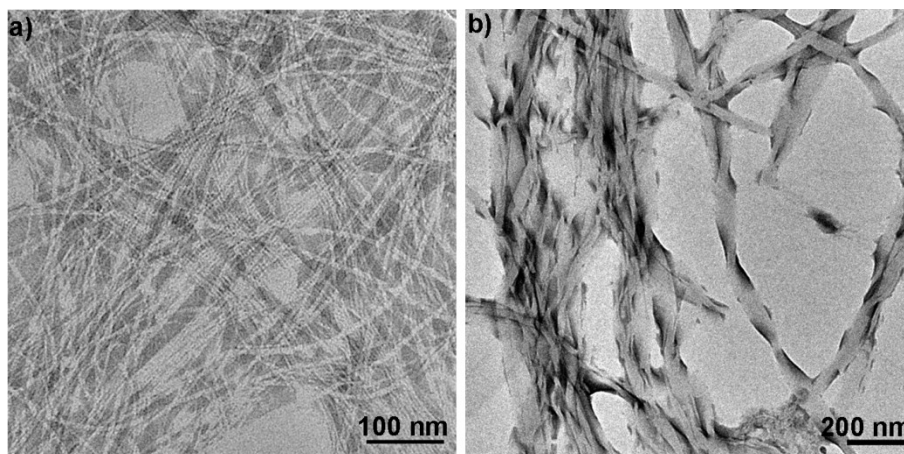

**Fig. S2** TEM images showing the (a) loose-packed fibrous bundles and (b) well-defined nanohelices formed after the incubation of spermidine into the liquid-crystalline peptide solution at 60 s and 6 h, respectively.

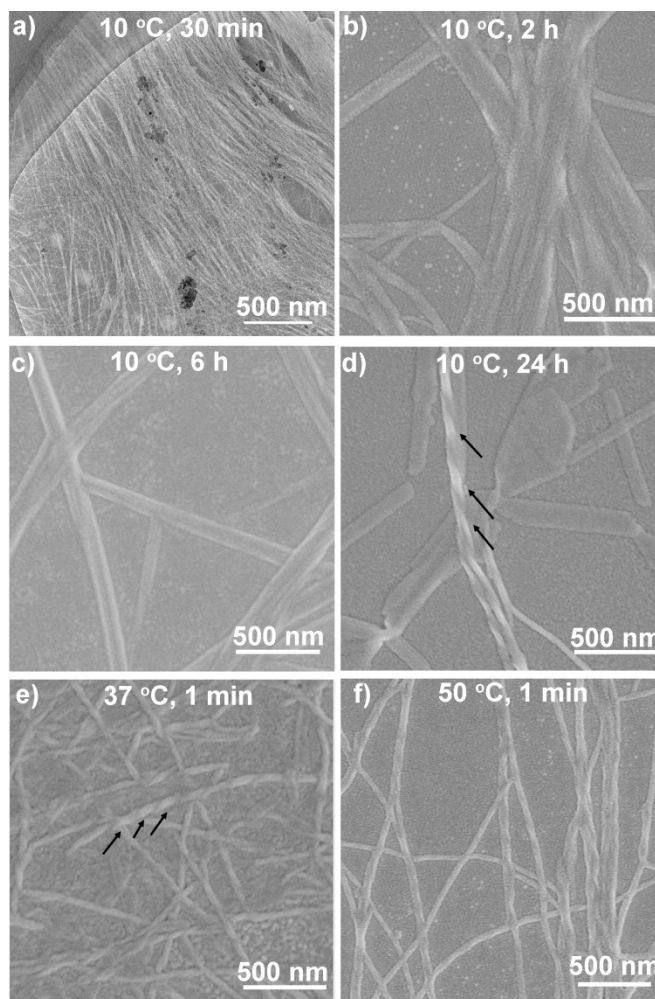

**Fig. S3** a-d) TEM (a) and SEM (b-d) images showing the very slow structural transition of nanofilaments into nanoribbons after the incorporation of spermidine into the peptide solutions at 10 °C. Only a small amount of nanohelices were formed after incubation for 24 h. e-f) SEM images showing the nanohelices formed after the incorporation of spermidine into the peptide solutions at 37 and 50 °, respectively. Homogenous nanohelices could be formed just after incubation for 1 min.

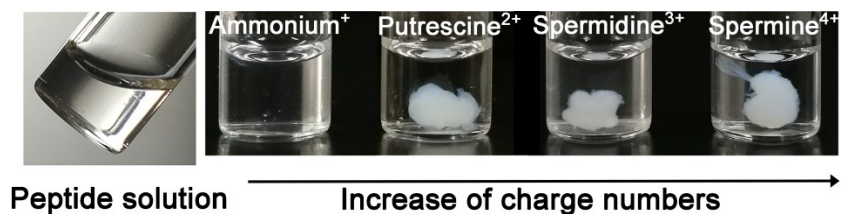

**Fig. S4** Macroscopic photographic images showing the peptide solutions after the incorporation of various polyamines bearing increasing number of positive charges. The most left image is a 10 mM Fmoc-FF peptide solution (50 mM Tris-HCl, pH 8.8) incubated in a glass vial. The peptide/polyamine mixture solutions contain 5 mM Fmoc-FF, 25 mM Tris-HCl and 5 mM polyamines with a pH of 8.6 at 20 °C.

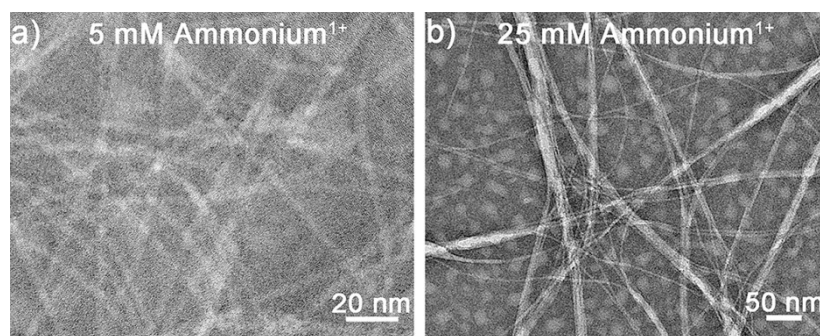

**Fig. S5** Transmission electron microscopy (TEM) images showing the condensation behavior of the peptide nanofilaments by using 5 mM and 25 mM monovalent ammonium<sup>1+</sup> cations, respectively. The mixture solutions contain 5 mM Fmoc-FF, 25 mM Tris-HCl with a pH of 8.6 at 20 °C.

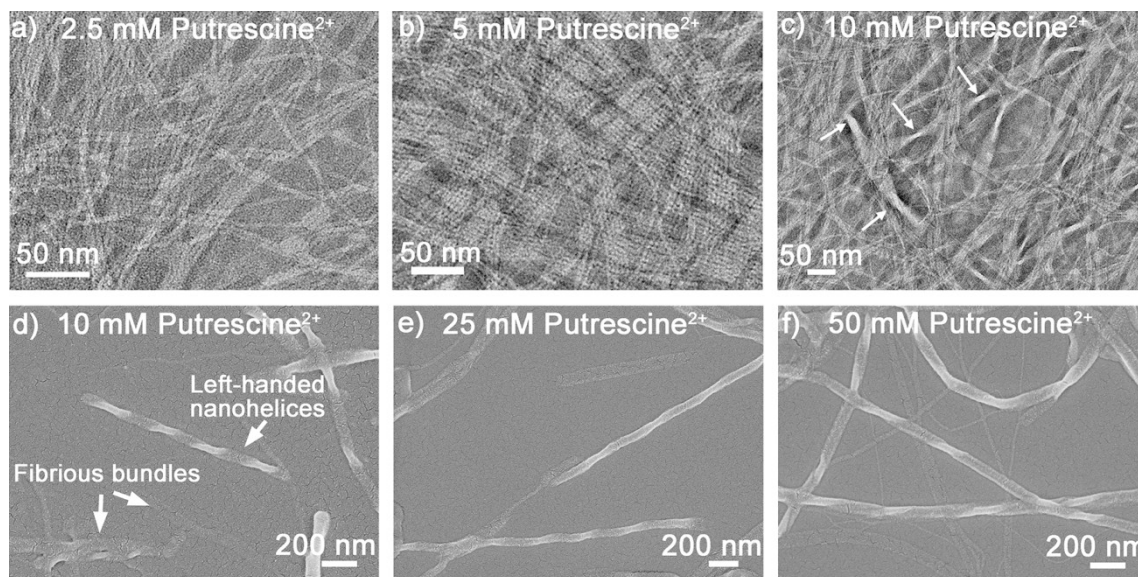

**Fig. S6** TEM (a-c) and SEM (d-f) images showing the condensation of peptide nanofilaments into fibrous bundles and twisted nanoribbons by using the divalent putrescine<sup>2+</sup> cations at various concentrations. The mixture solutions contain 5 mM Fmoc-FF, 25 mM Tris-HCl with a pH of 8.6 at 20 °C.

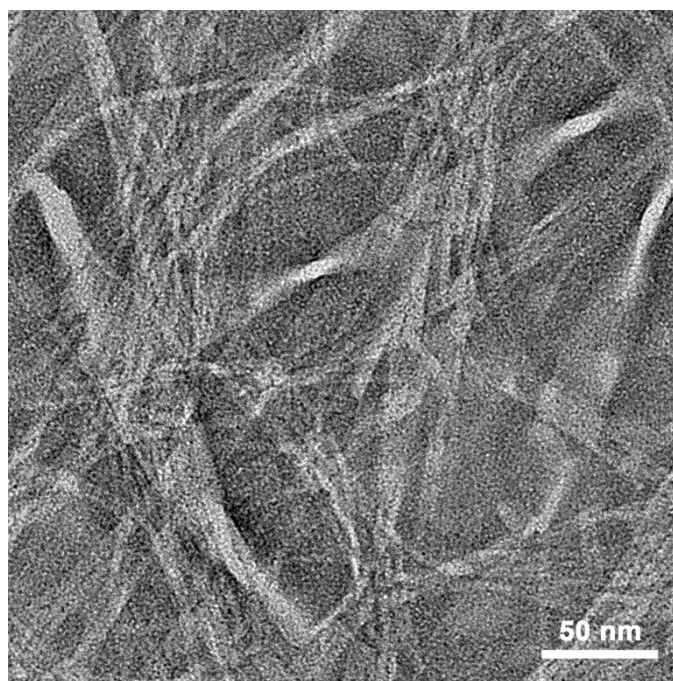

**Fig. S7** A high-magnification TEM image showing the transformation of peptide nanofilaments into fibrous bundles and twisted nanoribbons by using 10 mM divalent putrescine<sup>2+</sup> cations. The mixture solutions contain 5 mM Fmoc-FF, 25 mM Tris-HCl with a pH of 8.6 at 20 °C.

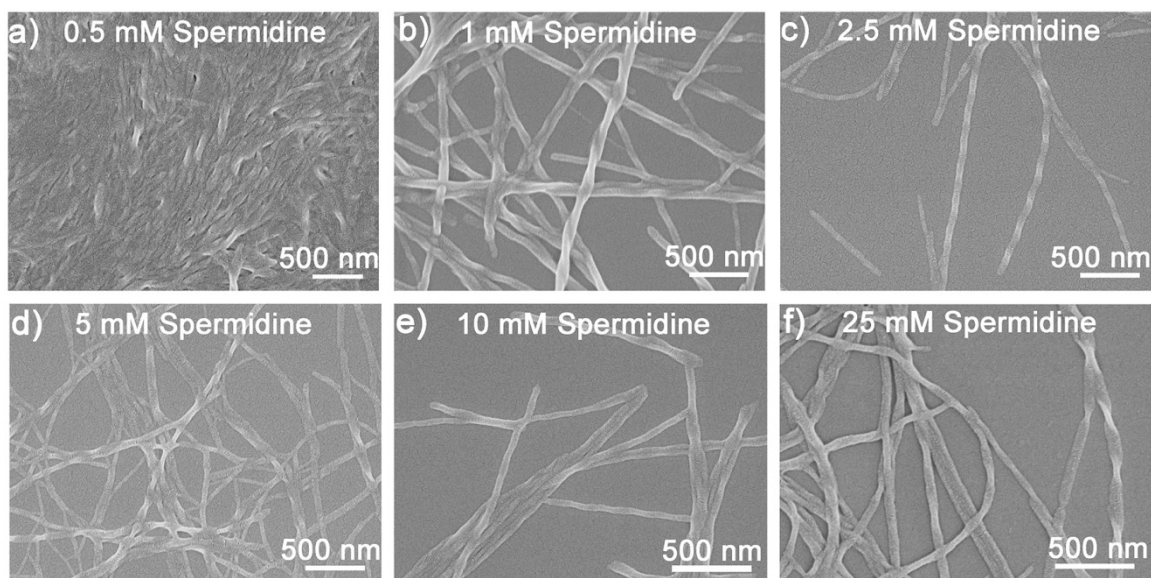

**Fig. S8** SEM images showing the condensation of peptide nanofilaments into twisted nanoribbons by using the trivalent spermidine<sup>3+</sup> cations at various concentrations. The mixture solutions contain 5 mM Fmoc-FF, 25 mM Tris-HCl with a pH of 8.6 at 20 °C.

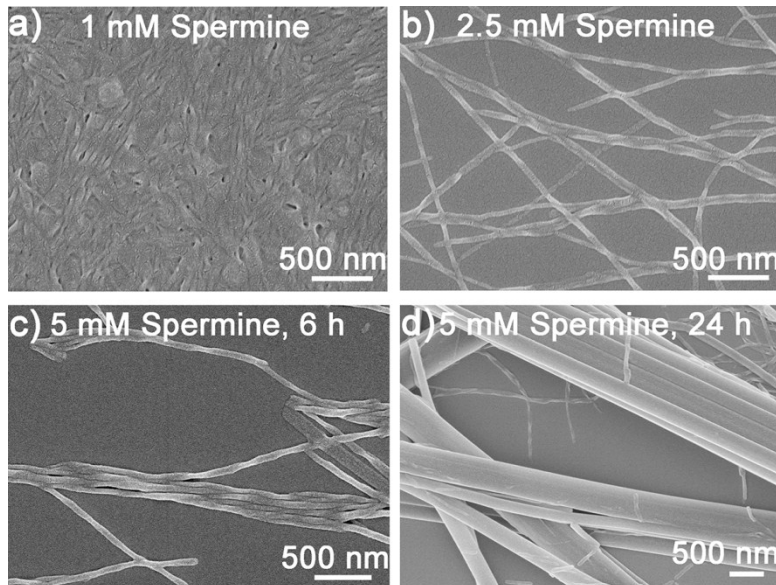

**Fig. S9** SEM images showing the condensation of the peptide nanofilaments by using the tetravalent spermine<sup>4+</sup> cations at various concentrations. Twisted nanoribbons can be formed using 1 or 2.5 mM spermine<sup>4+</sup> cations. However, by increasing the concentration up to 5 mM, the twisted nanoribbons become unstable, which transformed spontaneously into large microcrystals after the incubation for 12 h. The mixture solutions contain 5 mM Fmoc-FF, 25 mM Tris-HCl with a pH of 8.6 at 20 °C.

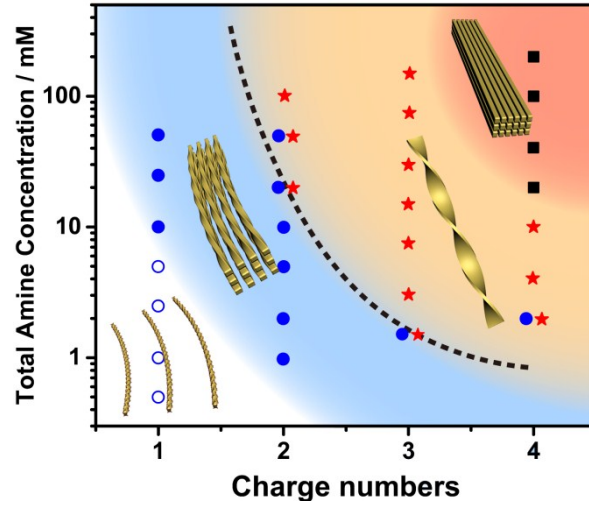

**Figure S10.** Phase diagram of the condensation of the peptide nanofilaments as a function of the polyamine charge number and total amine concentration. Blue circles correspond to repulsive nanofilaments; blue filled circles correspond to flat nanoribbons or giant fibrous bundles; red stars represent twisted nanoribbons; black squares represent large microcrystals. The black dashed curve denotes the critical concentration ( $C_c$ ) required to induce the bundling and twisting of the nanofilaments into homogeneous twisted nanoribbons.

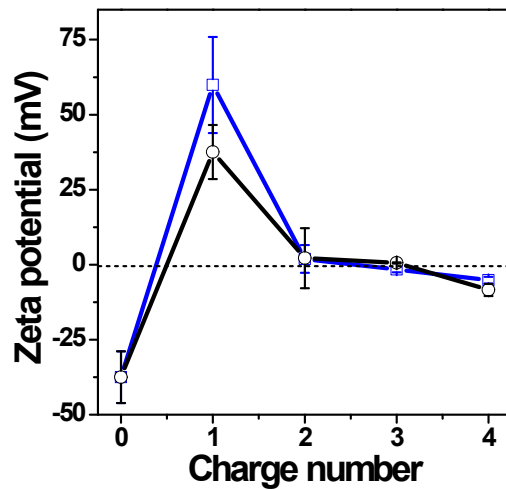

**Figure S11.** Zeta-potential of the peptide solutions (5 mM Fmoc-FF, 25 mM Tris-HCl, pH 8.6, 20 °C) in the presence of various polyamines as a function of the charge number of the polyamines. The concentration of the polyamines is 5 mM (black curve) and 10 mM (blue curve), respectively.

**Table S1** pKa values of the polyamines determined by Palmer et al. using potentiometric titration.<sup>2</sup>

| Polyamines | pKa                      |
|------------|--------------------------|
| Putrescine | 10.80, 9.63              |
| Spermidine | 10.95, 9.98, 8.56        |
| spermine   | 10.94, 10.12, 9.04, 7.97 |

## 2. References

- (1) Wang, Y.; Qi, W.; Wang, J.; Li, Q.; Yang, X.; Zhang, J.; Liu, X.; Huang, R.; Wang, M.; Su, R. Columnar Liquid Crystals Self-Assembled by Minimalistic Peptides for Chiral Sensing and Synthesis of Ordered Mesoporous Silica. *Chem. Mater.* **2018**, *30*, 7902-7911.
- (2) Palmer, B.N., Powell, H.K.J. Polyamine complexes with seven-membered chelate rings: complex formation of 3-azaheptane-1,7-diamine, 4-azaoctane-1,8-diamine (spermidine), and 4,9-diazadodecane-1,12-diamine (spermine) with copper (II) and hydrogen ions in aqueous solution. *J. Chem. Soc. Dalton* **1974**, *19*, 2089–2092.
